# Supplementary material
Source: PubMed Central journal article supplement (PMC5340416)
Supplement: NIHMS661107-supplement-Supplemental.pdf [file NIHMS661107-supplement-Supplemental.pdf]

## **SUPPLEMENTAL MATERIAL**

### **Measurement of Peri-Hematoma Edema in Intracerebral Hemorrhage**

Sebastian Urday, MPhil; Lauren A. Beslow, MD, MSCE; David W. Goldstein, BA; Anastasia Vashkevich, BA; Alison M Ayres, BA; Thomas W.K. Battey, BS; Magdy H. Selim, MD, PhD; W. Taylor Kimberly, MD, PhD; Jonathan Rosand, MD, MSc; Kevin N. Sheth, MD

Itemized List of Figures and Tables:

Figures I-VI

Table I-IV

Figures VII-X

## Online Supplemental Methods

Figures I-VII outline the steps for ICH and PHE measurement using Analyze 11.0 (AnalyzeDirect, Overland Park, KS, USA).

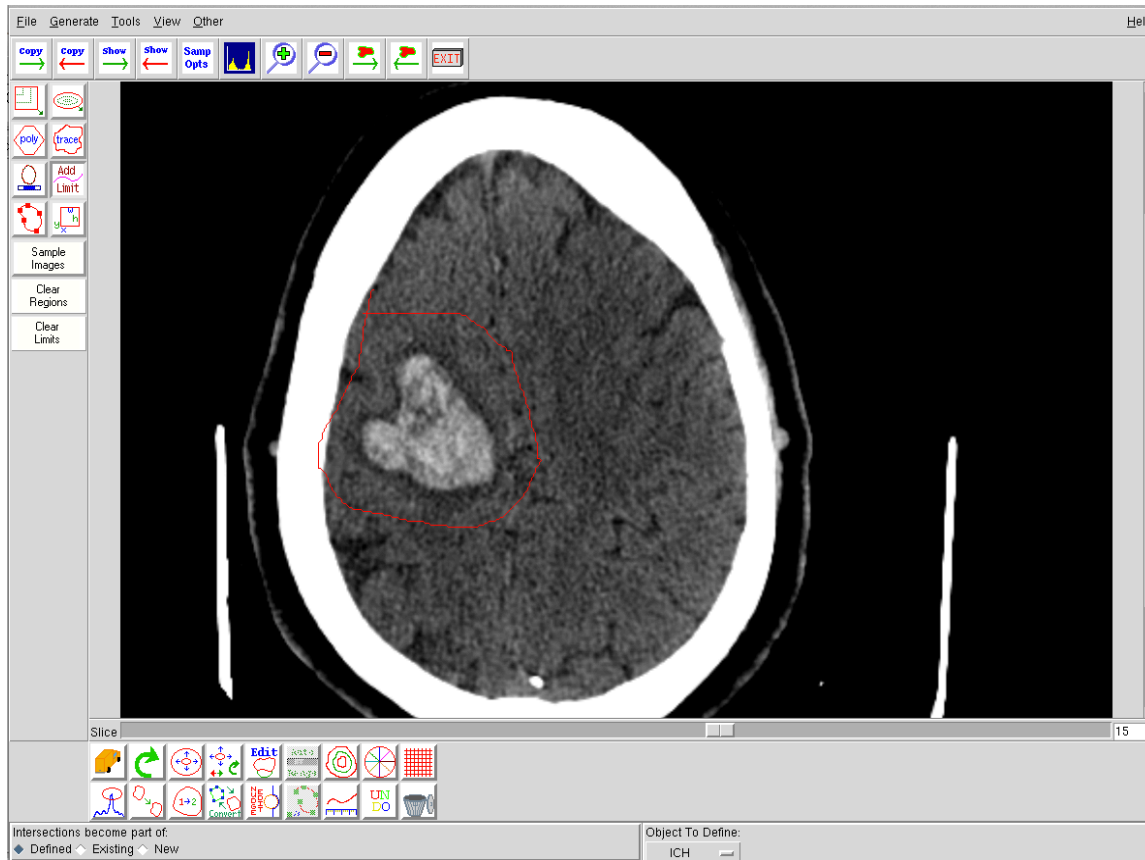

Figure I. In the Region of Interest module, click on the Add Limit icon and trace a limit line around the ICH. In this way the software's edge detection tool only calculates boundaries within the selected area.

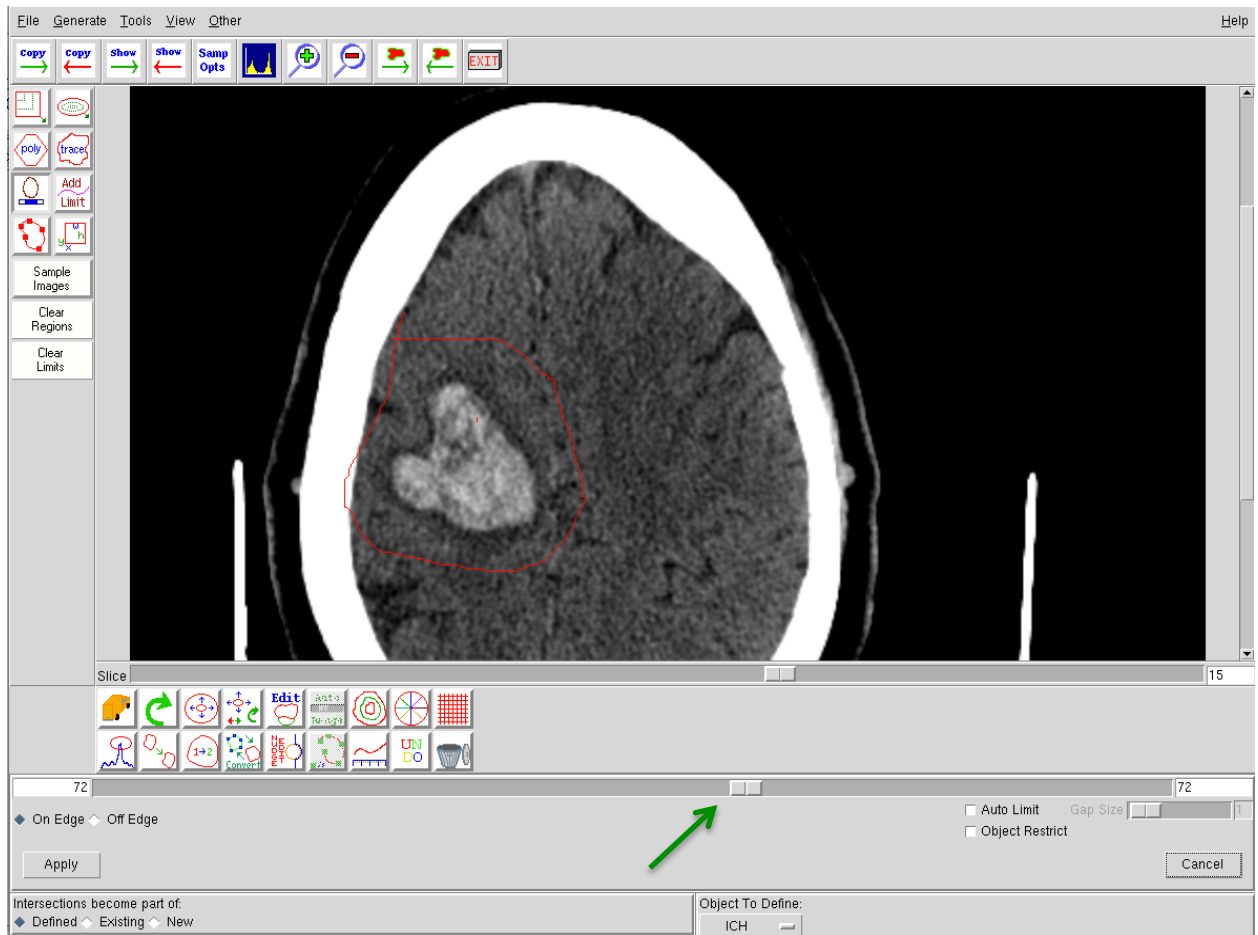

Figure II. Click on the AutoTrace tool icon (edge-detection tool) and then click on a hyperdense area of hemorrhage to set a 'seed point'. Once the 'seed point' is set, a slider bar appears (arrow). Grow the ICH boundary by dragging either side of the bar. Select the optimal boundary defining the hyperdense region of hemorrhage.

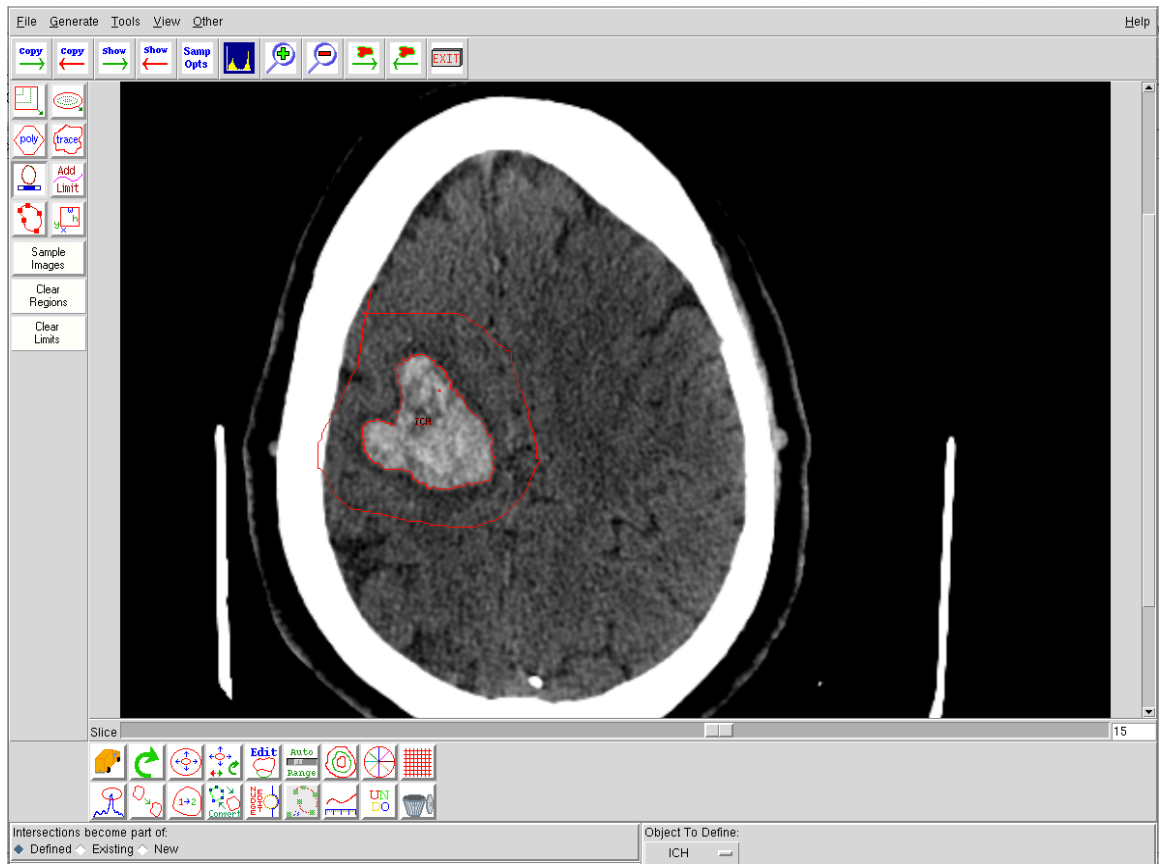

Figure III. Click Apply to set the ICH boundary. The step above can be repeated if needed to define multiple hemorrhages.

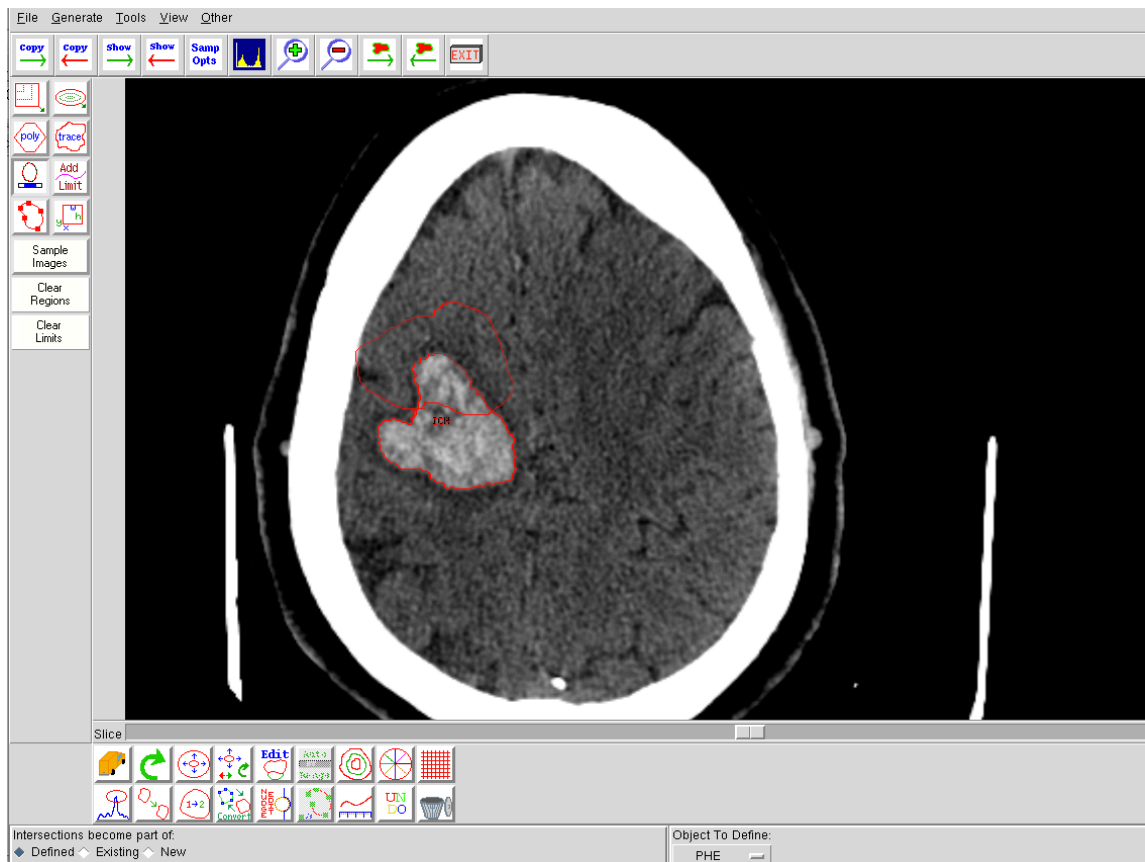

Figure IV. Click on the Add Limit icon and trace a limit line around a region that contains PHE. The rim of PHE is defined with the principle that it should be (a) more hypodense than the corresponding region in the contralateral hemisphere and (b) most hypodense immediately surrounding the hemorrhage. As before, click on the Autotrace tool icon. Then click on a hypodense area of PHE to set a 'seed point'. Once the 'seed point' is set, a slider bar appears. Grow the PHE boundary by dragging either side of the bar. Select the optimal boundary defining the hypodense region of PHE.

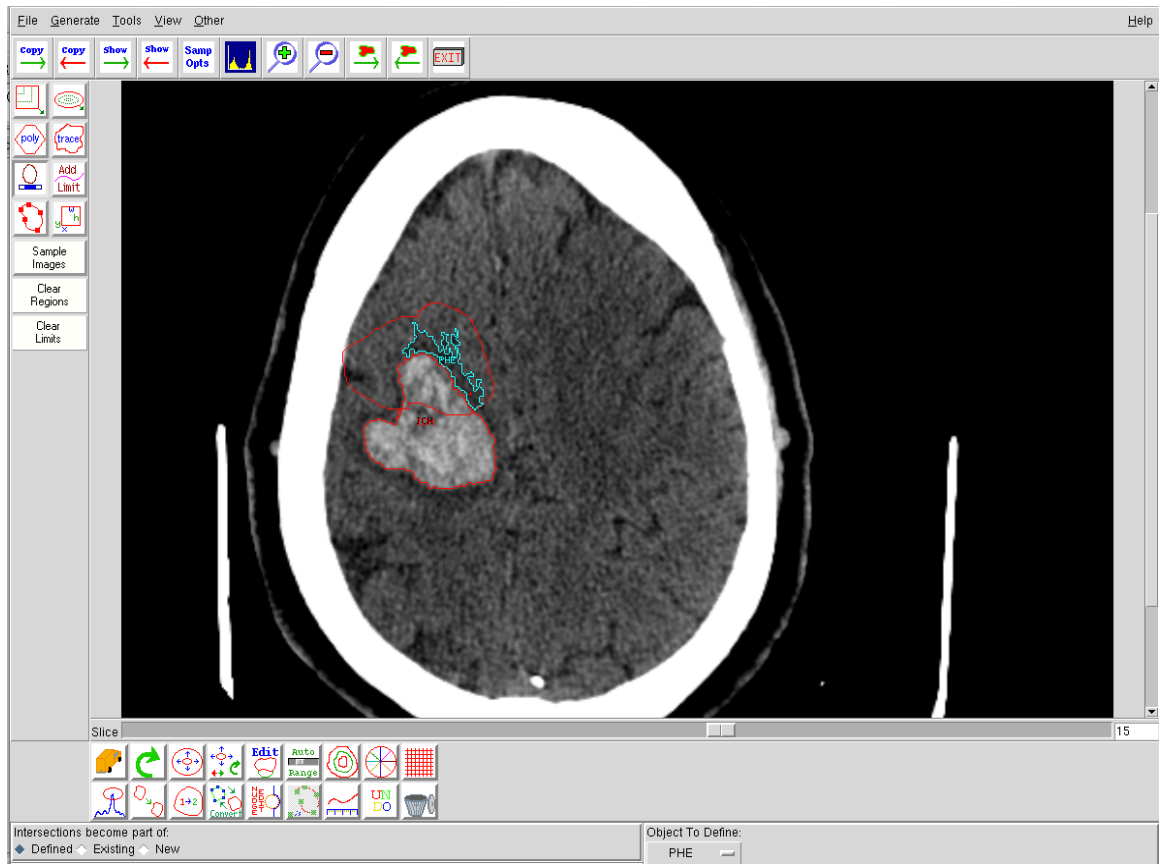

Figure V. Click Apply to set the PHE boundary.

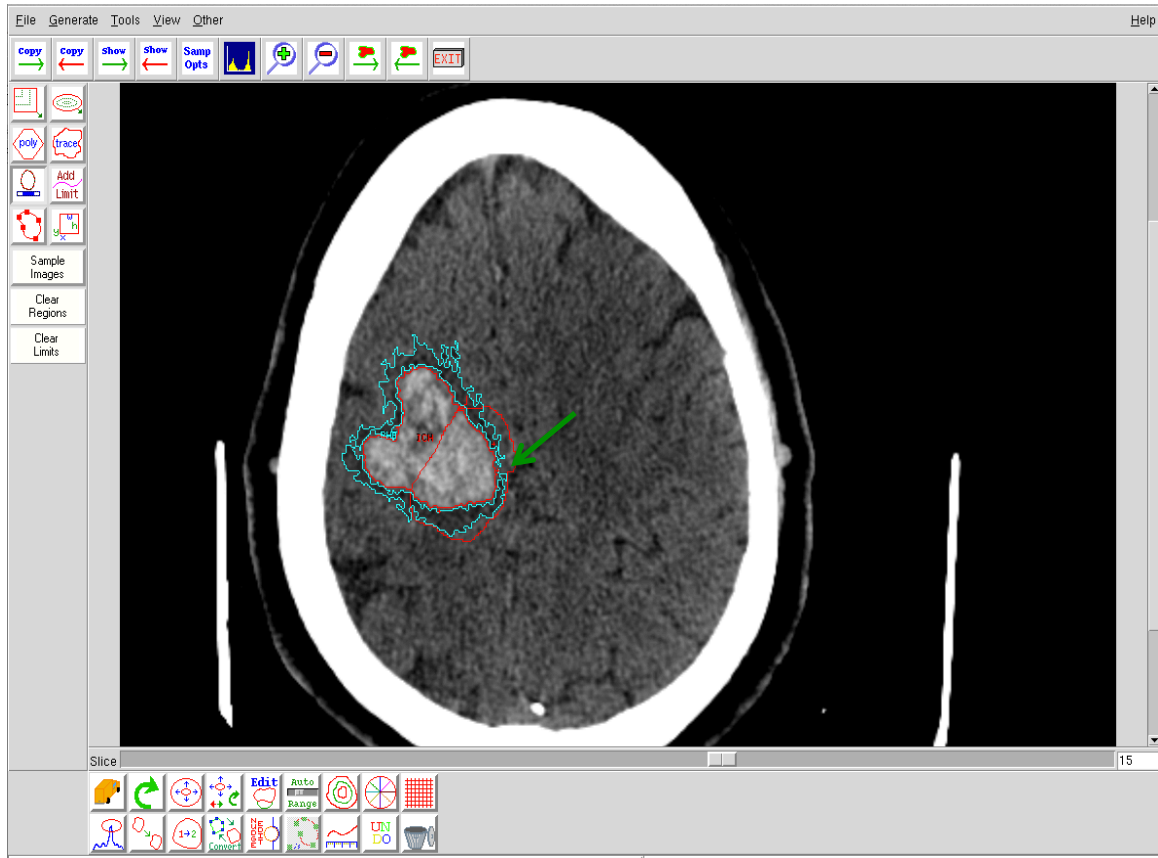

Figure VI. Example showing how the principle above was used to delineate PHE. Here a limit line is used to exclude a region that is more hypodense further out from the hemorrhage, rather than immediately surrounding the hemorrhage. In this case it corresponds to a sulci from the contralateral hemisphere.

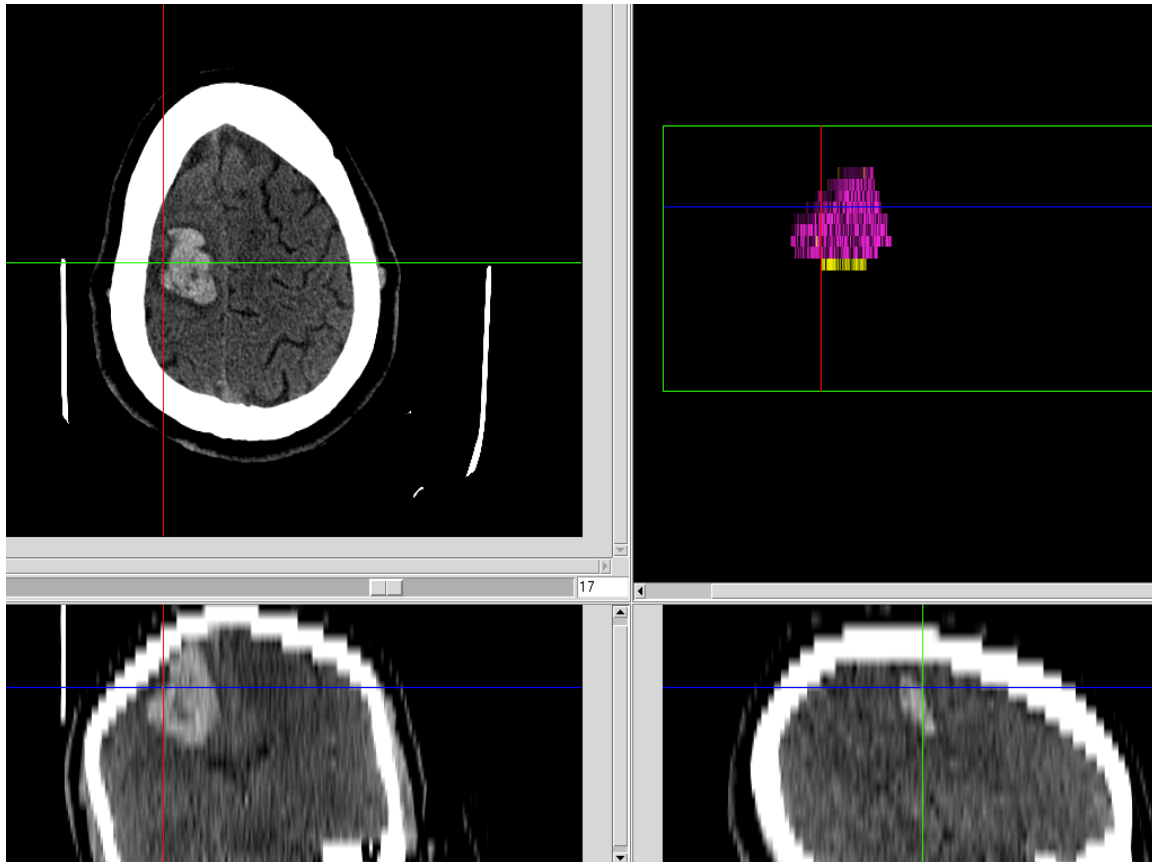

Figure VII. The Volume Edit module (shown above) provides a three-dimensional view of each lesion. It can be used to better visualize the extent and distribution of each lesion. It can be opened in parallel with the Region of Interest module to aid the operator in the selection of the optimal boundary for the lesion.



**Online Supplemental Results**

| Table I. Selection of studies investigating PHE |                                         |                                                          |                        |                                            |                                                                                                                                                                                                                                                                                                                                     |
|-------------------------------------------------|-----------------------------------------|----------------------------------------------------------|------------------------|--------------------------------------------|-------------------------------------------------------------------------------------------------------------------------------------------------------------------------------------------------------------------------------------------------------------------------------------------------------------------------------------|
| Study                                           | Software package for PHE quantification | Interrater/Intrater ICCs (95% CI) for PHE quantification | Validation against MRI | Number of patients used for MRI validation | Method for PHE measurement                                                                                                                                                                                                                                                                                                          |
| Gebel et al. <sup>1</sup>                       | In-house software                       | NA/NA                                                    | No                     | NA                                         | Authors used a statistical algorithm. The principles used to differentiate PHE from other entities that are also hypodense, or the thresholds used, are not specified                                                                                                                                                               |
| Sansing et al. <sup>2</sup>                     | MCID                                    | NA/NA                                                    | No                     | NA                                         | Authors used software with semiautomated edge detection. PHE was determined by selection of the hypodense area immediately surrounding the hemorrhage. The principles used to differentiate PHE from other entities that are also hypodense, or whether thresholds were used, are not specified                                     |
| McCarron et al. <sup>3</sup>                    | Not specified                           | NA/0.96 (0.90-0.98)                                      | No                     | NA                                         | Authors used a modified version of the ABC/2 method. The principles used to differentiate PHE from other entities that are also hypodense, or whether thresholds were used, are not specified                                                                                                                                       |
| Levine et al. <sup>4</sup>                      | Alice                                   | 0.98/NA                                                  | No                     | NA                                         | Not specified                                                                                                                                                                                                                                                                                                                       |
| Mehdiratta et al. <sup>5</sup>                  | Not specified                           | 0.90/0.95                                                | No                     | NA                                         | Authors used “automated threshold values”. The principles used to differentiate PHE from other entities that are also hypodense, or the thresholds used, are not specified                                                                                                                                                          |
| Arima et al. <sup>6</sup>                       | MIStar Version 3.2                      | 0.91 (0.87-0.94)/NA                                      | No                     | NA                                         | Authors used computer-assisted multislice planimetric and voxel threshold techniques. The principles used to differentiate PHE from other entities that are also hypodense, or the thresholds used, are not specified                                                                                                               |
| Volbers et al. <sup>7</sup>                     | Leonardo V                              | 0.96 (0.93-0.99)/0.96 (0.93-0.99)                        | Yes                    | 15                                         | Authors used the 5-33 HU threshold. Authors differentiated PHE from other entities that are also hypodense by comparison to the contralateral hemisphere and a more restrictive definition of the region of interest                                                                                                                |
| Appelboom et al. <sup>8</sup>                   | MIPAV                                   | 0.88/NA                                                  | No                     | NA                                         | Not specified                                                                                                                                                                                                                                                                                                                       |
| McCourt et al. <sup>9</sup>                     | Analyze 11.0                            | 0.99 (0.98-0.99)/NA                                      | No                     | NA                                         | Authors first manually traced PHE and then applied the 5-23 HU threshold. The principles used to differentiate PHE from other entities that are also hypodense are not specified                                                                                                                                                    |
| Present study                                   | Analyze 11.0                            | 0.98 (0.96-1.00)/0.99 (0.99-1.00)                        | Yes                    | 18                                         | Boundaries were outlined with an edge-detection tool and adjusted after inspection of the three orthogonal planes. PHE was delineated with the additional principle that it should be (a) more hypodense than the corresponding area in the contralateral hemisphere and (b) most hypodense immediately surrounding the hemorrhage. |

HU, Hounsfield unit; ICC, intraclass correlation coefficient; NA, not applicable; PHE, peri-hematoma edema

|                                          | Total (n = 20)   |
|------------------------------------------|------------------|
| Age, years, mean (SD)                    | 64.6 (12.8)      |
| Male, n, (%)                             | 12 (60)          |
| Race, n (%)                              |                  |
| White                                    | 20 (100)         |
| GCS score, median (IQR)                  | 14 (9-15)        |
| Location of Hematoma, n (%)              |                  |
| Lobar                                    | 8 (40%)          |
| Deep                                     | 12 (60%)         |
| Presence of IVH, n, (%)                  | 8 (40%)          |
| ICH volume, cc, median (IQR)             | 24.0 (10.5-39.6) |
| Onset to first scan, hours, median (IQR) | 4.2 (2.9-8.9)    |

SD, standard deviation; n, number; cc, cubic centimeters; IQR, interquartile range

|                   | Volume cc, median (IQR)            | Wilcoxon rank-sum p-value | Interrater ICC (95% CI) | Intrater ICC (95%, CI) |
|-------------------|------------------------------------|---------------------------|-------------------------|------------------------|
| Baseline          |                                    |                           |                         |                        |
| R1, R2            | 23.2 (10.9-35.6), 24.0 (11.5-38.7) | 0.81                      | 0.99 (0.99-1.00)        | NA                     |
| R1 retest         | 24.2 (11.2-39.1)                   | 0.91                      | NA                      | 0.99 (0.99-1.00)       |
| 24-hours post-ICH |                                    |                           |                         |                        |
| R1, R2            | 23.3 (11.0-36.5), 24.1 (11.7-38.9) | 0.85                      | 0.99 (0.99-1.00)        | NA                     |
| R1 retest         | 24.2 (11.7-39.8)                   | 0.94                      | NA                      | 0.99 (0.99-1.00)       |

R1, Rater 1; R2, Rater 2; cc, cubic centimeters; IQR, interquartile range; ICC, intraclass correlation coefficient; CI, confidence interval; NA, not applicable

|                   | Volume cc, median (IQR) | Wilcoxon rank-sum p-value | Interrater ICC (95% CI) | Intrater ICC (95%, CI) |
|-------------------|-------------------------|---------------------------|-------------------------|------------------------|
| Baseline          |                         |                           |                         |                        |
| R1, R2            | 0 (0-5.1), 0 (0-5.6)    | 0.95                      | 0.99 (0.99-1.00)        | NA                     |
| R1 retest         | 0 (0-5.6)               | 0.98                      | NA                      | 0.99 (0.99-1.00)       |
| 24-hours post-ICH |                         |                           |                         |                        |
| R1, R2            | 0 (0-3.1), 0 (0-3.9)    | 0.81                      | 0.99 (0.98-1.00)        | NA                     |
| R1 retest         | 0 (0-3.8)               | 0.98                      | NA                      | 0.99 (0.99-1.00)       |

R1 indicates Rater 1; R2, Rater 2; cc, cubic centimeters; IQR, interquartile range; ICC, intraclass correlation coefficient; CI, confidence interval; NA, not applicable

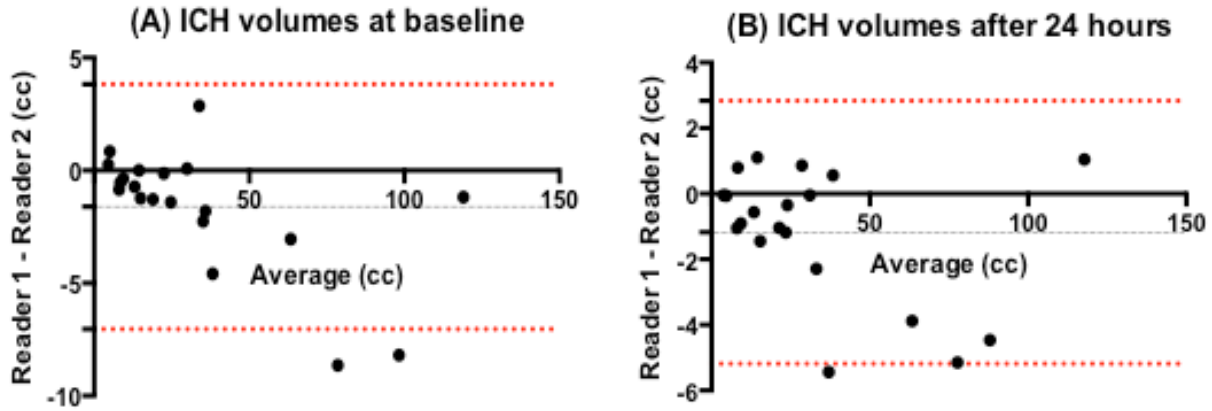

Figure VIII. Bland-Altman plots of inter-rater consistency of ICH measurements. Dashed black line represents the bias (mean of the difference between measurements). Dashed red lines represent the limits of agreement (mean  $\pm$  1.96 SD). At baseline and 24-hours post-ICH the bias was -1.6 cc (SD, 2.8) and -1.2 cc (SD, 2.0), respectively. The outliers corresponded to irregularly shaped hemorrhages.

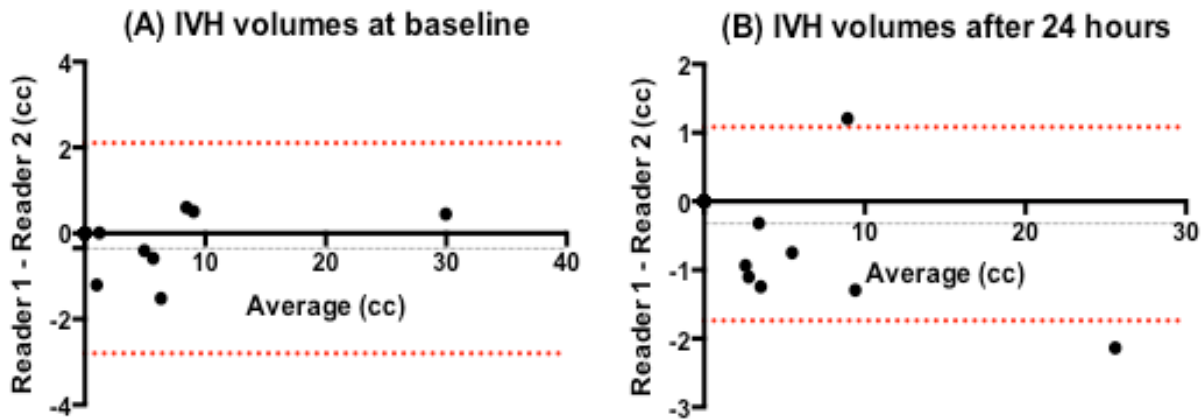

Figure IX. Bland-Altman plots of inter-rater consistency of IVH measurements. Dashed black line represents the bias (mean of the difference between measurements). Dashed red lines represent the limits of agreement (mean  $\pm$  1.96 SD). At baseline and 24-hours post-ICH the bias was -0.1 (SD, 0.5) and -0.3 (SD, 0.7), respectively. The outliers corresponded to hemorrhages with a faint boundary between ICH and IVH.

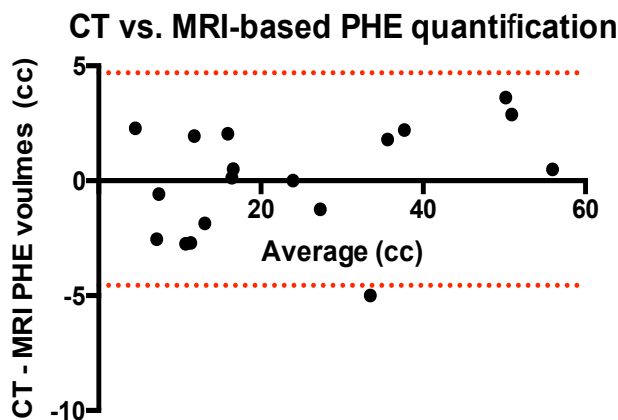

Figure X. Bland-Altman plots comparing CT and MRI-based PHE measurement. The dashed black line represents the bias (mean of the difference between measurements). The dashed red lines represent the limits of agreement (mean  $\pm$  1.96 SD). The bias was 0.07 cc (SD, 2.4).

### Online Supplement References

1. Gebel JM, Jr., Jauch EC, Brott TG, Khoury J, Sauerbeck L, Salisbury S, et al. Natural history of perihematomal edema in patients with hyperacute spontaneous intracerebral hemorrhage. *Stroke*. 2002;33:2631-2635
2. Sansing LH, Kaznatcheeva EA, Perkins CJ, Komaroff E, Gutman FB, Newman GC. Edema after intracerebral hemorrhage: Correlations with coagulation parameters and treatment. *J Neurosurg*. 2003;98:985-992
3. McCarron MO, McCarron P, Alberts MJ. Location characteristics of early perihematomal oedema. *J Neurol Neurosurg Psychiatry*. 2006;77:378-380
4. Levine JM, Snider R, Finkelstein D, Gurol ME, Chanderraj R, Smith EE, et al. Early edema in warfarin-related intracerebral hemorrhage. *Neurocrit Care*. 2007;7:58-63
5. Mehdiratta M, Kumar S, Hackney D, Schlaug G, Selim M. Association between serum ferritin level and perihematomal edema volume in patients with spontaneous intracerebral hemorrhage. *Stroke*. 2008;39:1165-1170
6. Arima H, Wang JG, Huang Y, Heeley E, Skulina C, Parsons MW, et al. Significance of perihematomal edema in acute intracerebral hemorrhage the interact trial. *Neurology*. 2009;73:1963-1968
7. Volbers B, Staykov D, Wagner I, Dorfler A, Saake M, Schwab S, et al. Semi-automatic volumetric assessment of perihemorrhagic edema with computed tomography. *European Journal of Neurology*. 2011;18:1323-1328
8. Appelboom G, Bruce SS, Hickman ZL, Zacharia BE, Carpenter AM, Vaughan KA, et al. Volume-dependent effect of perihematomal oedema on outcome for spontaneous intracerebral haemorrhages. *J Neurol Neurosurg Psychiatry*. 2013;84:488-493
9. McCourt R, Gould B, Gioia L, Kate M, Coutts SB, Dowlatshahi D, et al. Cerebral perfusion and blood pressure do not affect perihematomal edema growth in acute intracerebral hemorrhage. *Stroke*. 2014;45:1292-1298
